# Supplementary material for: Folic acid intervention changes liver Foxp3 methylation and ameliorates the damage caused by Th17/Treg imbalance after long-term alcohol exposure
Source: Royal Society of Chemistry journal article supplement (doi:10.1039/d1fo04267j), 2022-01-01
Supplement: d1fo04267j1.pdf [file d1fo04267j1.pdf]

## Supplemental Figure

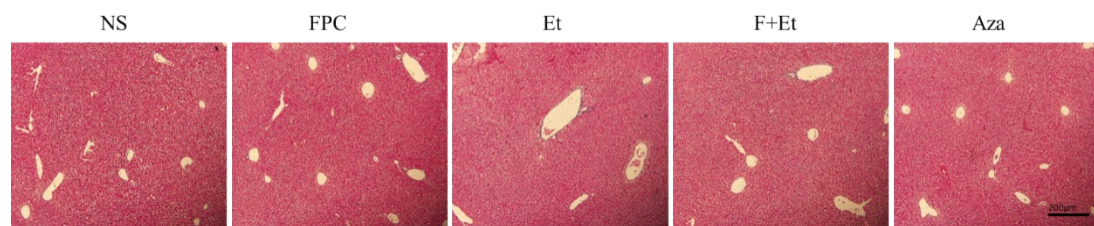

Supplemental Fig. 1 Masson staining in the mice liver.

4µm sections of liver tissue were subjected to Masson staining and collagen fibers were stained blue (bar=200µm).

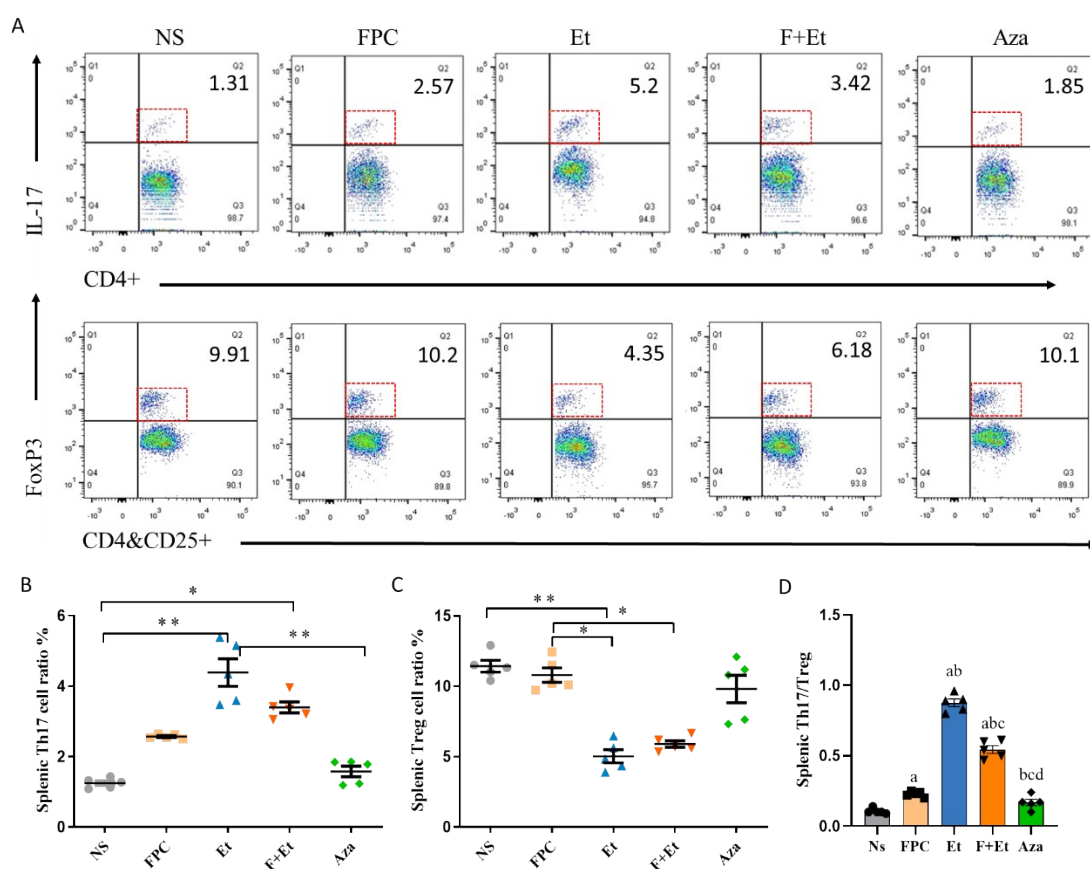

Supplemental Fig. 2 Folic acid attenuates alcoholic inflammatory responses by restoring the splenic equilibrium of Th17/Treg.

Splenic mononuclear cells were isolated and subjected to flow cytometry to calculate the proportion of Th17 (CD4+&IL-17+) and Treg (CD4+&CD25+&Fop3+) cells (A). The proportion of Th17(B), Treg(C) was processed by Kruskal–Wallis test, and its ratio(D) were processed by ANOVA, Values are expressed as mean ± SEM (n=5). A

significant difference ( $P<0.05$ ) is identified by different letters: a, vs. the NS control group; b, vs. the FPC control group; c, vs. the Et group; d, vs. the F+Et group.

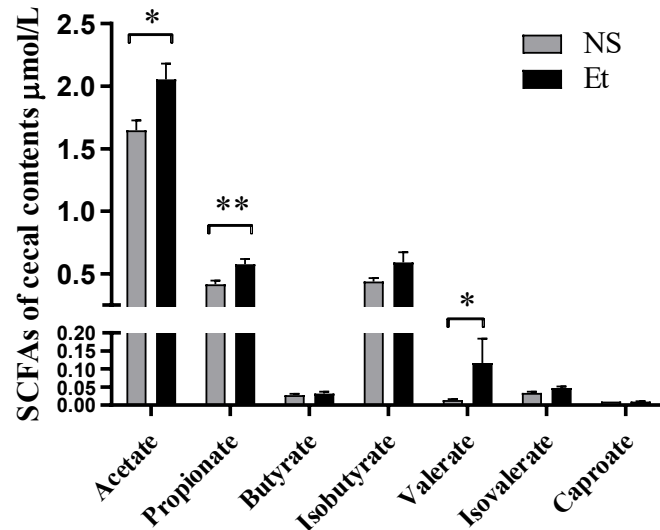

Supplemental Fig. 3 Short chain fatty acid (SCFA) contents between the NS and Et group in the cecum. Values are expressed as mean  $\pm$  SEM (n=10). \* $P<0.05$ , \*\* $P<0.01$ .

A total of 30 mg of cecum contents for each sample was diluted with distilled water at a 1:9 dilution, After homogenization and centrifugation, the supernatant was filtered through a 0.45 $\mu$ m nylon membrane. Each 200 $\mu$ L supernatant sample was added 200 $\mu$ L Acetone, 50% sulfuric acid 20 $\mu$ L, 200 $\mu$ L ether, 60mg sodium chloride successively, and the supernatant was homogenized and centrifuged and then measured by HPLC (Agilent 1260, equipped with a diode-array detector and chemstation workstation, ZORBAX SB-C18 column, 4.6 mm $\times$ 250 mm $\times$ 5 mm).

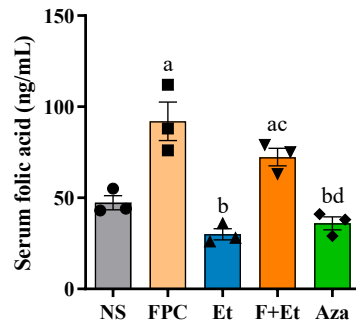

Supplemental fig. 4 Serum folic acid levels in each group. Values are expressed as mean  $\pm$  SEM (n=3). A significant difference ( $P<0.05$ ) is identified by different letters: a, vs. the NS control group; b, vs. the FPC control group; c, vs. the Et group; d, vs. the F+Et group. A total of 0.1mL of serum for each sample was diluted with distilled water at a 1:9 dilution and then centrifuged at 4 °C 10000 r/min for 10 min (such process should protect from light during the whole operation), and take 20  $\mu$ L supernatant measured by HPLC (Agilent 1260, with a 280nm diode-array detector and chemstation workstation, mobile phase: 0.2% phosphoric acid water: acetonitrile = 90:10, velocity: 1 mL/min).
